# Supplementary material
Source: Springer Nature journal article supplement (https://www.springermedizin.de/resource/supplementary/12902_2008_80_MOESM1_ESM.pdf/9516196)

Std. Deviation =28.07  
Mean = 341.4  
N = 92.00

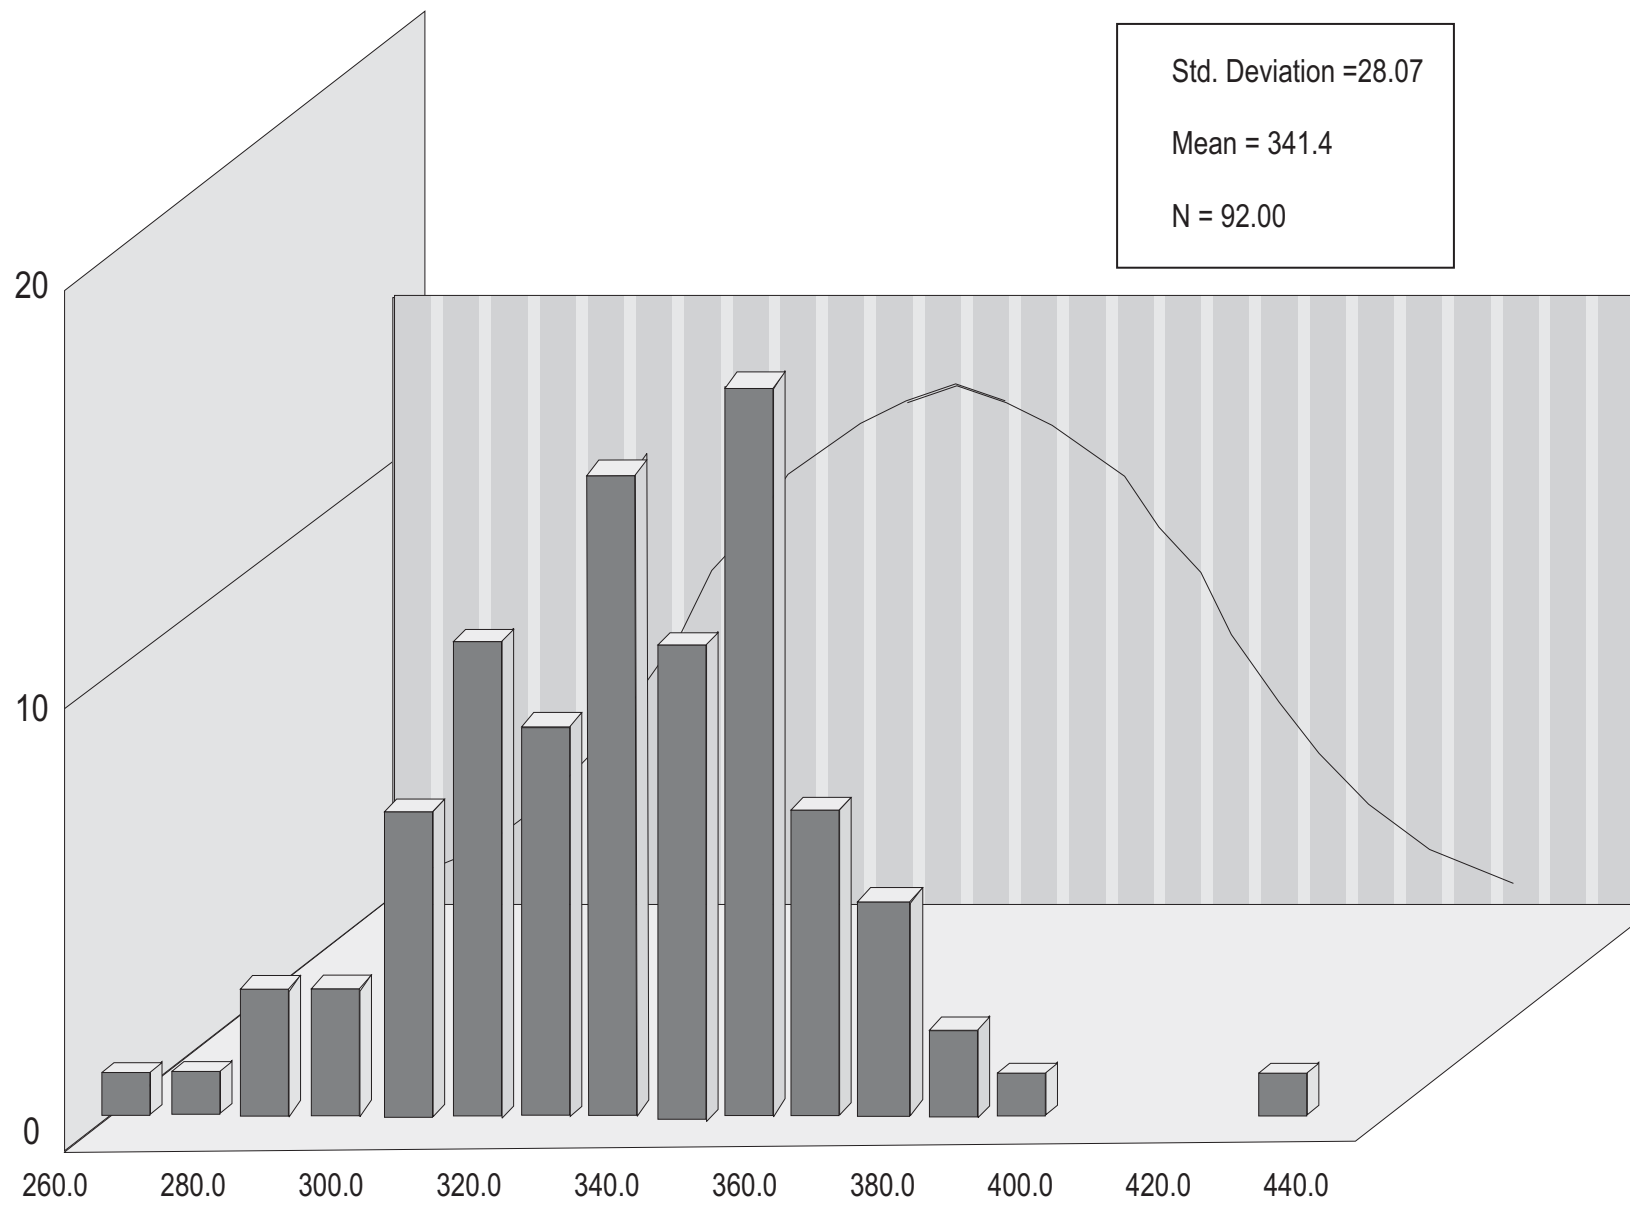

Supplement: MOESM1 [file 9516196]
